# Supplementary material for: Synthesis, crystal structure investigation, DFT analyses and antimicrobial studies of silver(i) complexes with N,N,N′,N′′-tetrakis(2-hydroxyethyl/propyl) ethylenediamine and tris(2-hydroxyethyl)amine
Source: Royal Society of Chemistry journal article supplement (doi:10.1039/c3nj00729d), 2014-01-01
Supplement: c3nj00729d.pdf [file c3nj00729d.pdf]

### Supplementary Data

**Table T1** Comparison of selected ( Experimental and calculated) bond distances (Å) and bond angles ( ° ) for complexes (1), (2) and (3).

| Bond lengths     | Exp.  | Calc. | Dev.   | Bond angles   | Exp.   | Calc.  | Dev.  |
|------------------|-------|-------|--------|---------------|--------|--------|-------|
| <b>Comp. (1)</b> |       |       |        |               |        |        |       |
| Ag - N1          | 2.456 | 2.449 | 0.007  | N1- Ag - N2   | 78.70  | 79.10  | -0.40 |
| Ag - N2          | 2.442 | 2.480 | -0.038 | N1 Ag - O1    | 71.34  | 76.20  | -4.86 |
| Ag - O1          | 2.600 | 2.455 | 0.145  | N1-Ag - O4B   | 134.41 | 120.90 | 13.5  |
| Ag - O4B         | 2.390 | 2.520 | -0.130 | N2- Ag - O4B  | 144.23 | 146.00 | -1.77 |
| Ag...AgB         | 3.245 | 2.885 | 0.360  | N2- Ag - O1   | 125.48 | 125.10 | 0.38  |
|                  |       |       |        | O4B - Ag - O1 | 85.44  | 88.10  | -2.66 |
| <b>Comp. (2)</b> |       |       |        |               |        |        |       |
| Ag - N1          | 2.481 | 2.527 | -0.046 | N1 - Ag - N2  | 78.11  | 78.80  | -0.69 |
| Ag - N2          | 2.439 | 2.473 | -0.034 | N1 - Ag - O1  | 69.78  | 70.40  | -0.62 |
| Ag - O1          | 2.561 | 2.523 | 0.038  | N1 - Ag - O3B | 137.36 | 130.60 | 6.76  |
| Ag - O3B         | 2.472 | 2.502 | -0.030 | N2 - Ag - O3B | 141.41 | 145.90 | -4.49 |
| Ag - O4          | 2.642 | 2.824 | -0.182 | N2 - Ag - O1  | 127.99 | 128.60 | -0.61 |
| Ag...AgB         | 3.237 | 3.202 | 0.035  | N2 - Ag - O4  | 69.70  | 69.22  | 0.48  |
|                  |       |       |        | O3B - Ag - O1 | 86.66  | 82.90  | 3.76  |
|                  |       |       |        | O1- Ag - O4   | 161.21 | 161.43 | -0.22 |
| <b>Comp.(3)</b>  |       |       |        |               |        |        |       |
| Ag - N1          | 2.350 | 2.572 | -0.222 | N1 - Ag - O1  | 73.06  | 70.00  | 3.06  |
| Ag - N2          | 2.279 | 2.456 | -0.177 | N1 - Ag - O2  | 71.45  | 70.30  | 1.51  |
| Ag - O1          | 2.679 | 2.543 | 0.136  | N1 - Ag - O3  | 74.11  | 71.60  | 2.51  |
| Ag - O2          | 2.722 | 2.533 | 0.189  | O1 - Ag - O2  | 107.56 | 103.20 | 4.36  |
| Ag - O3          | 2.664 | 2.540 | 0.124  | O1 - Ag - O3  | 121.74 | 118.10 | 3.64  |
|                  |       |       |        | O2 - Ag - O3  | 105.68 | 107.10 | -1.42 |
|                  |       |       |        | N2 - Ag - N1  | 174.58 | 171.90 | 2.68  |

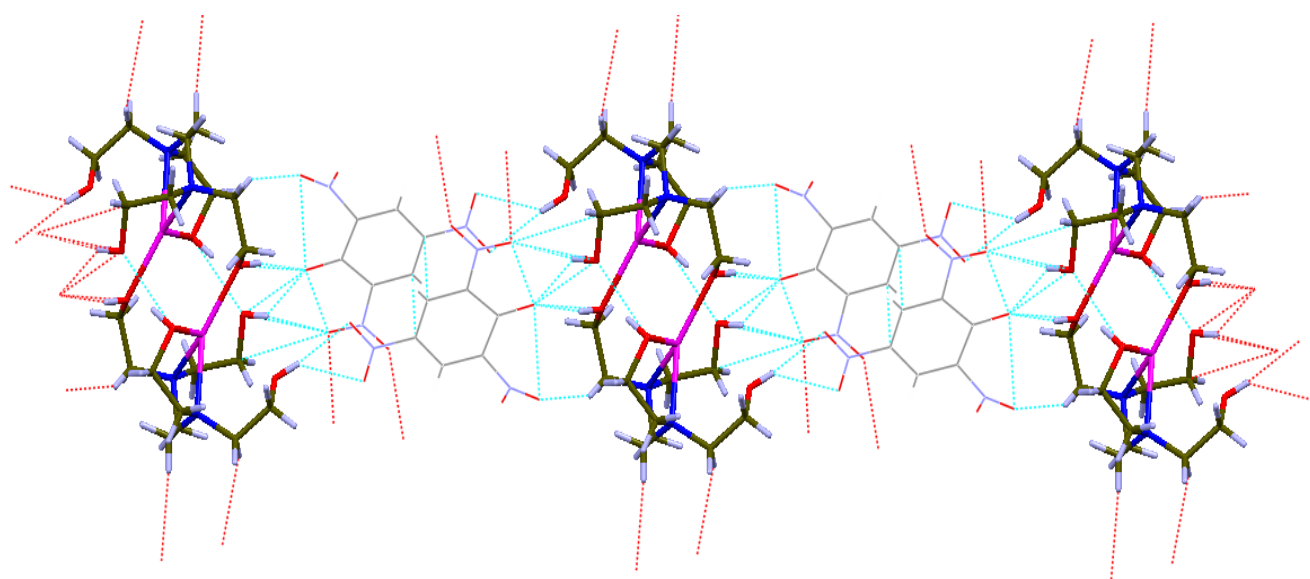

**Fig. S1** Side view of the polymer chain of complex (**1**) extended along the crystallographic 'a' axis.

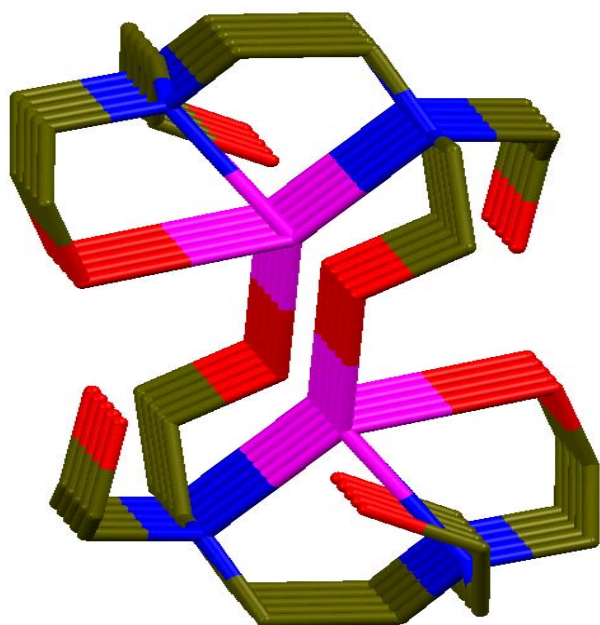

**Fig. S2** Top view of the polymer chain of complex (**1**) extended along the crystallographic 'c' axis . Picrate anions have been removed for clarity.

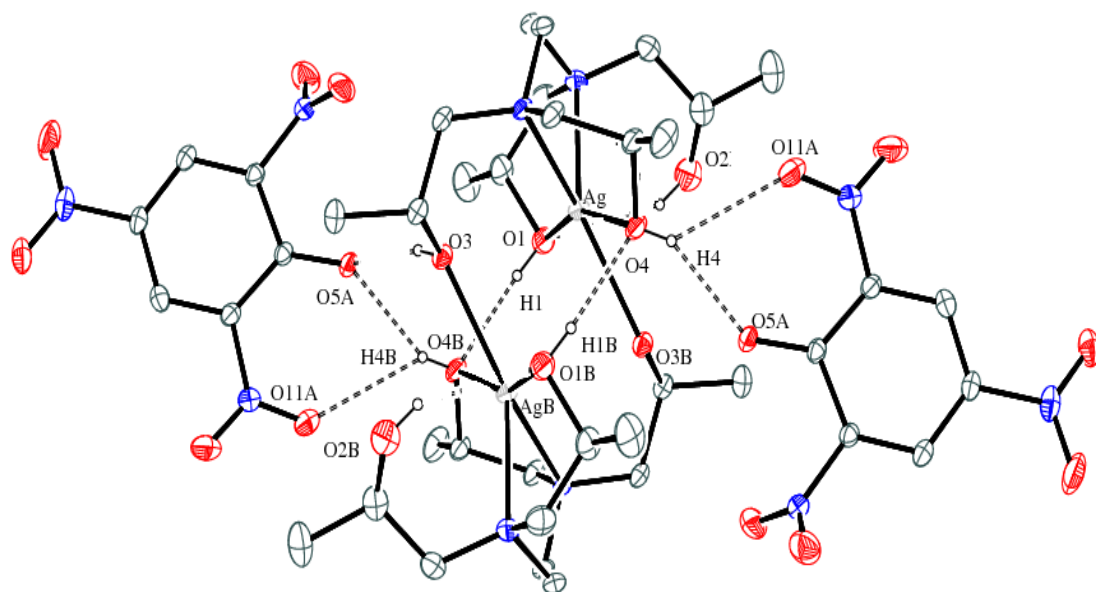

**Fig. S3** Molecular structure of complex (2) with hydrogen bonding interactions. [Symmetry Code A =  $1-x+1/2, -1/2 + y, 1-z+1/2$ , B =  $2-x, 1-y, 2-z$ ]

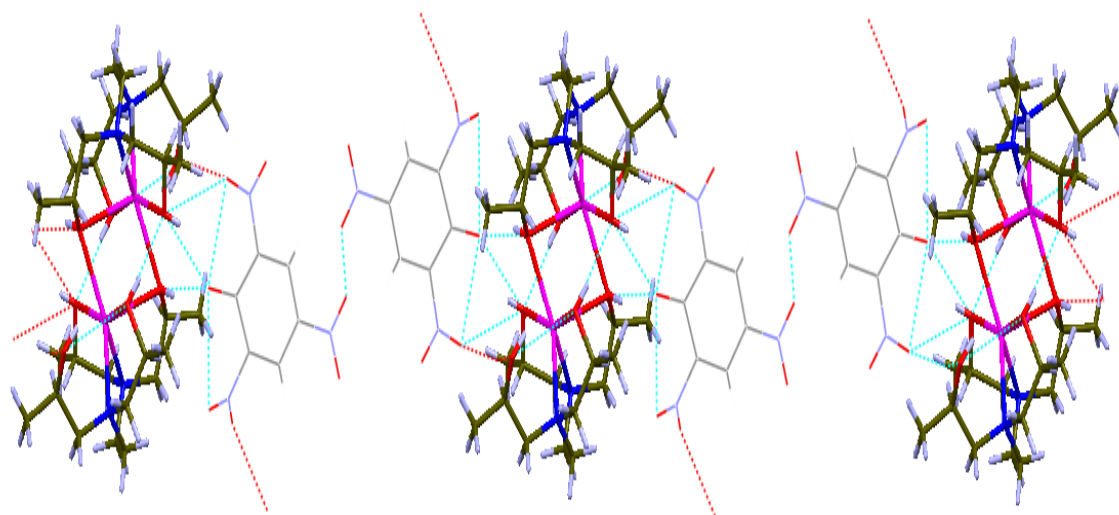

**Fig. S4** Side view of the polymer chain of complex (2) extended along the crystallographic 'a' axis.

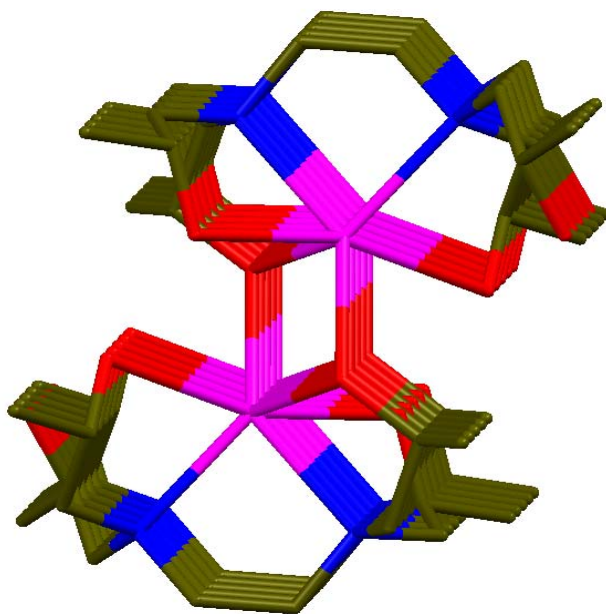

**Fig. S5** Top view of the polymer chain of complex (2) extended along the crystallographic 'c' axis, Picrate anions have been removed for clarity.

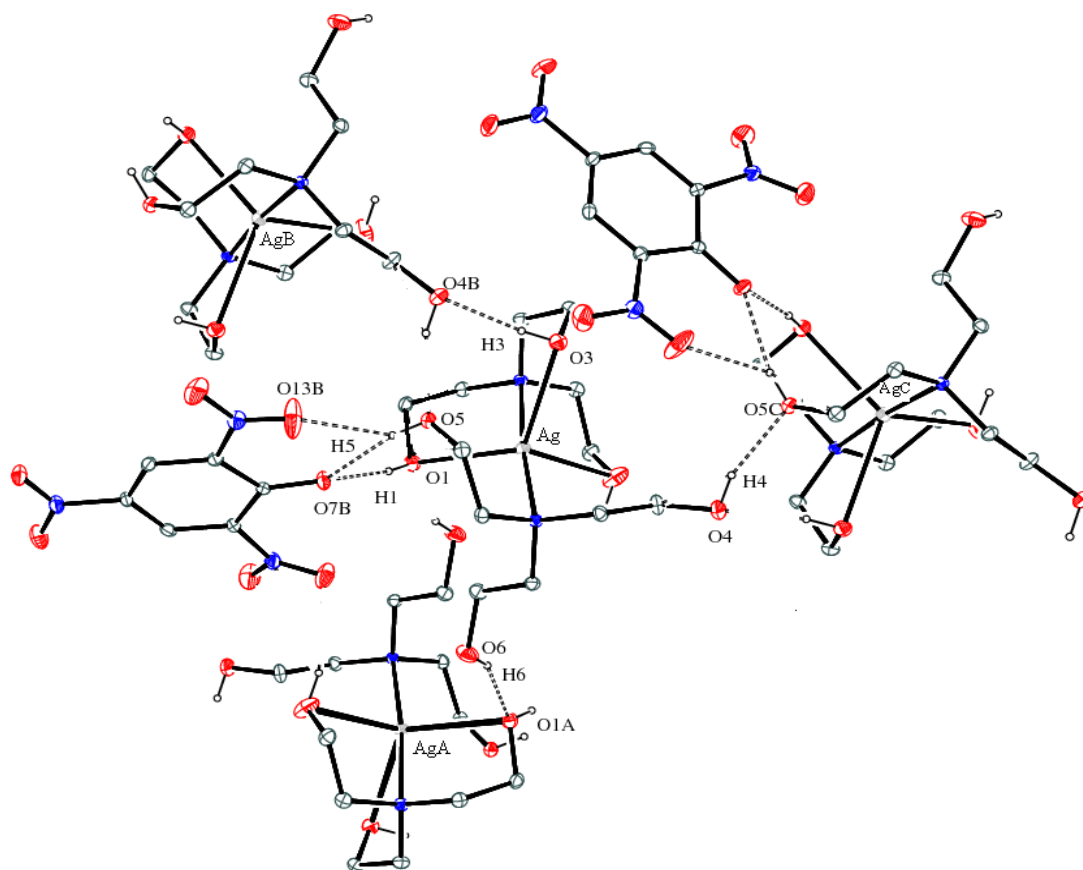

**Fig. S6** Molecular structure of the complex (3) with hydrogen bonding interactions.  
[Symmetry Code: A = -x, -y, 2-z, B = x, 1/2 -y, z + 1/2 , c = x, 1/2-y, -1/2+ z]

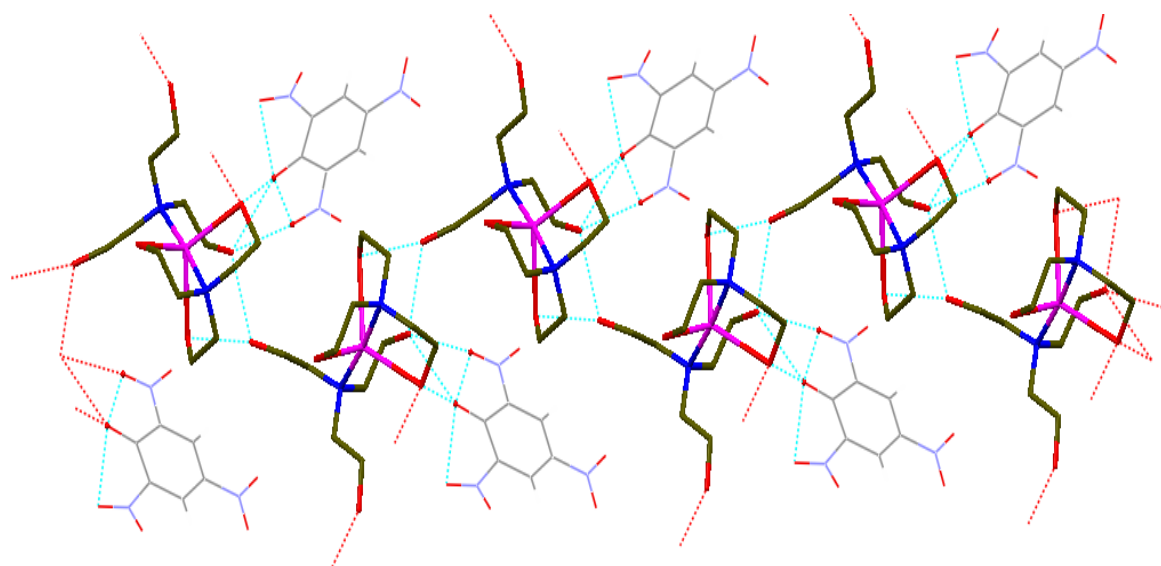

**Fig. S7** Side view of the polymer chain of complex (3) extended along crystallographic 'a' axis .



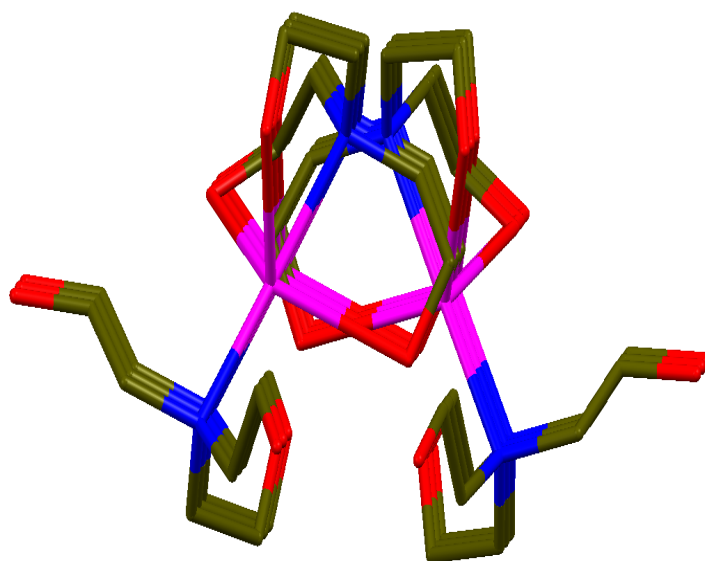

**Fig. S8** Top view of the polymeric chain of complex **(3)** extended along crystallographic 'c' axis. Picrate anions have been removed for clarity.

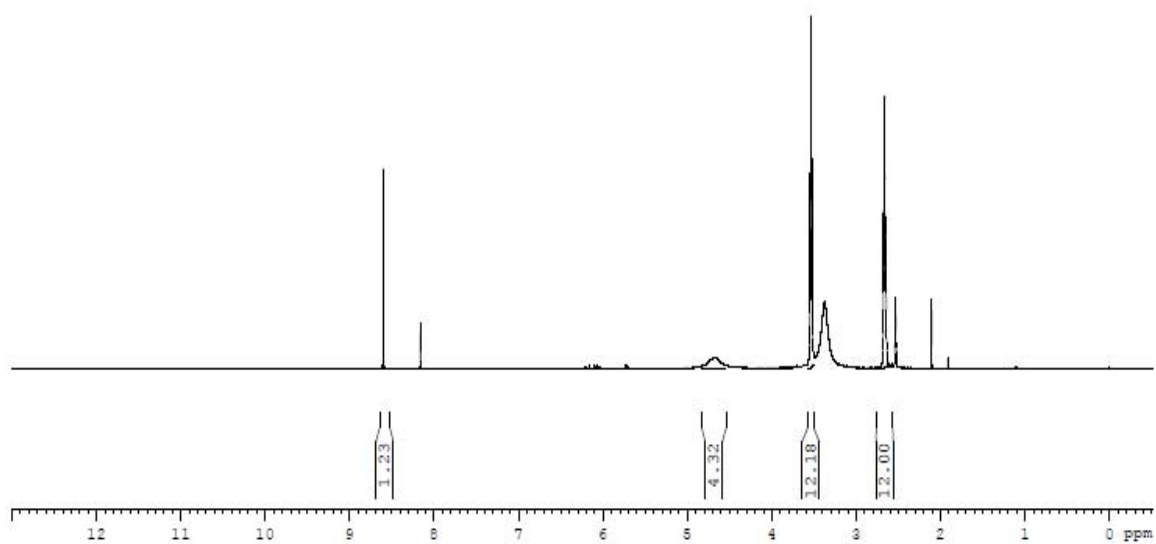

**Fig. S9**  $^1\text{H}$  NMR spectra of  $[\text{Ag}(\text{THEEN})_2]_2(\text{PIC})_2$

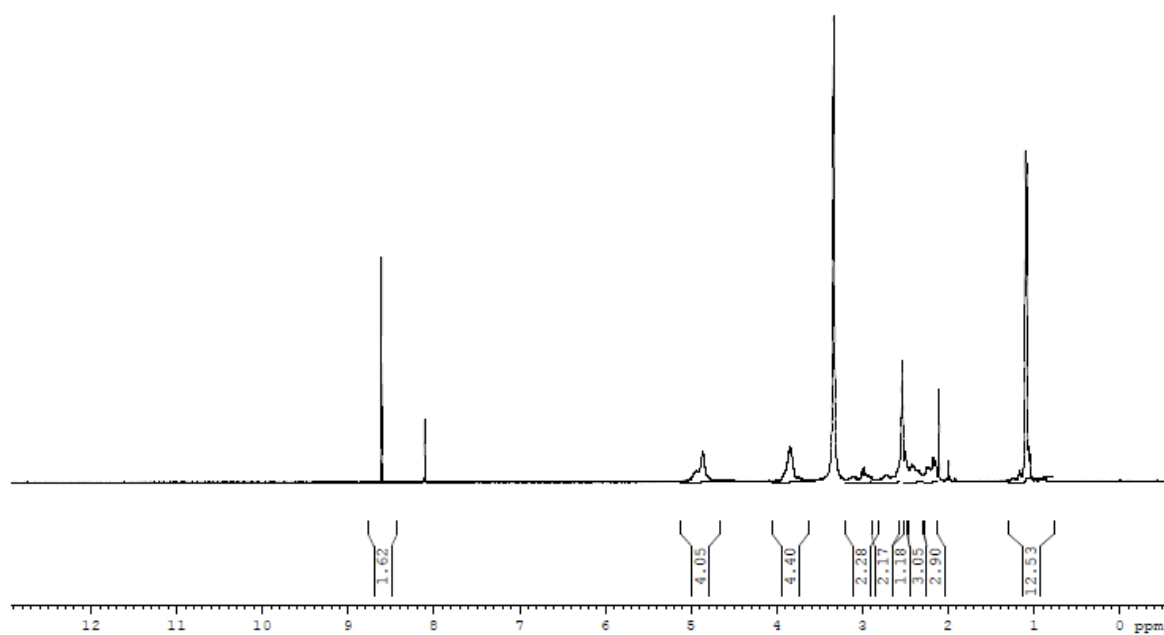

**Fig. S10**  $^1\text{H}$  NMR spectra of  $[\text{Ag}(\text{THPEN})]_2(\text{PIC})_2$

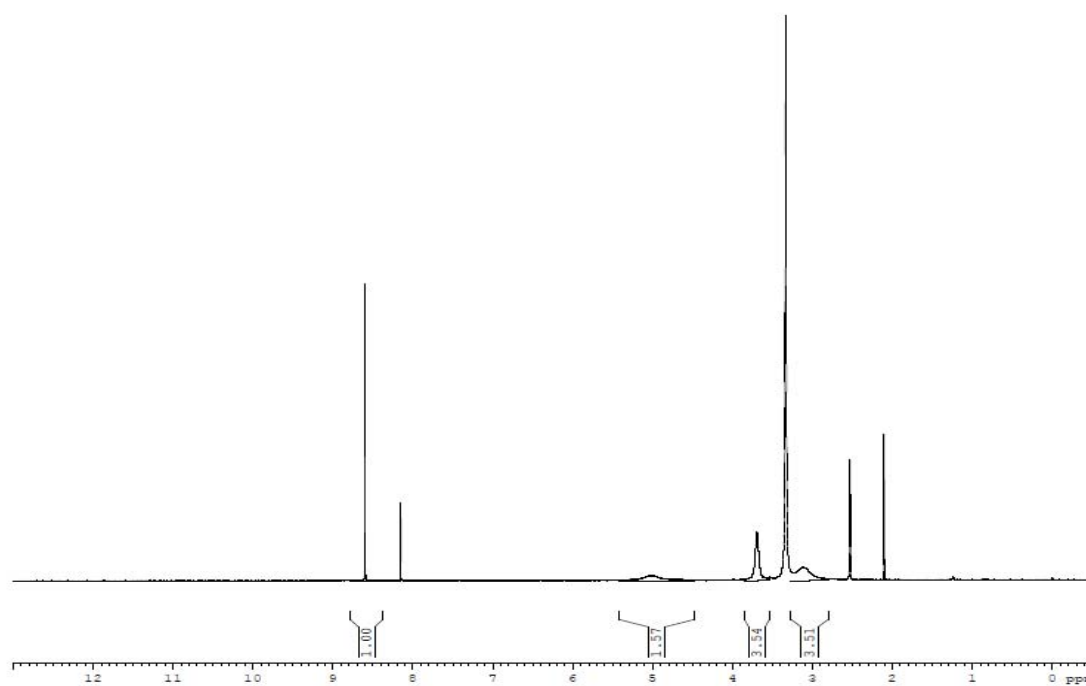

**Fig. S11**  $^1\text{H}$  NMR spectra of  $[\text{Ag}(\text{TEAH}_3)_2]$  (PIC)

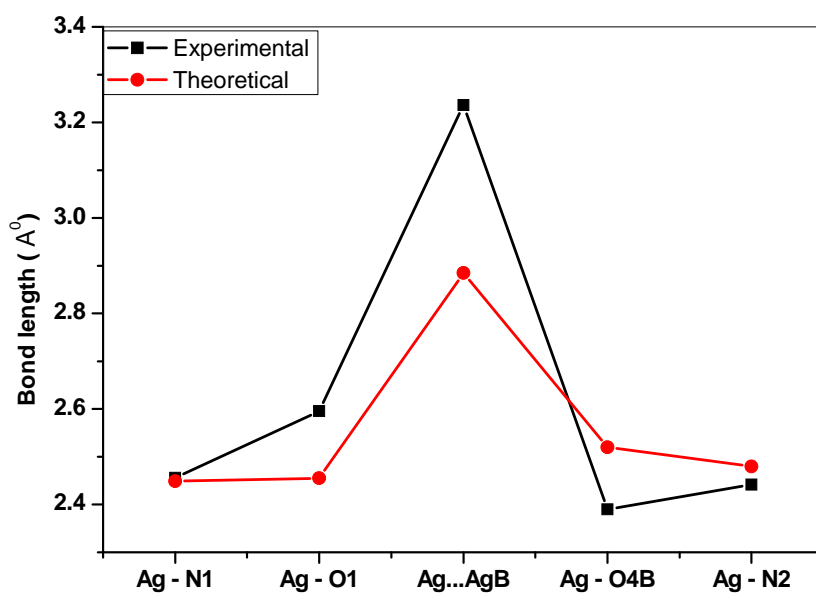

(a)

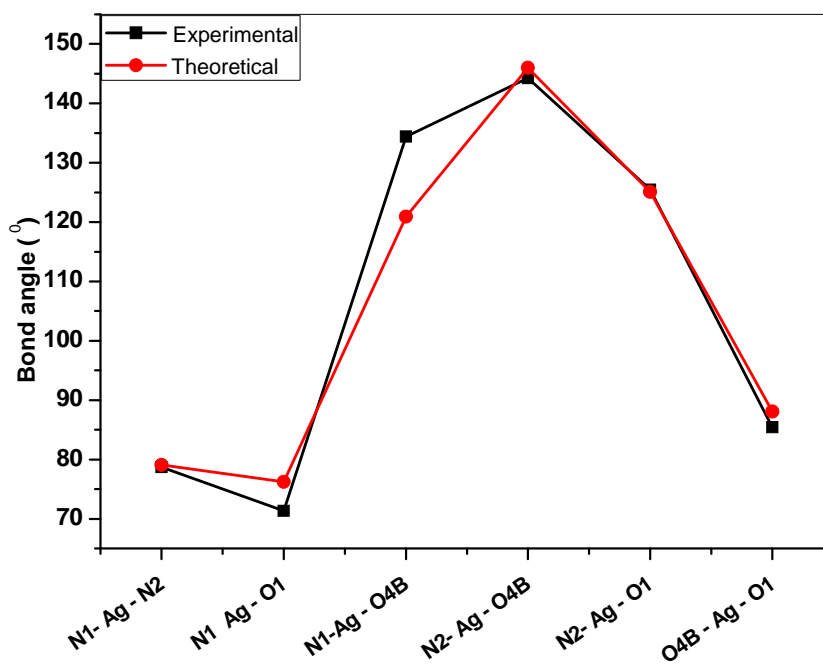

(b)

**Fig. S12** Deviations of theoretical and experimental (a) bond lengths (Å) (b) bond angles (°) for complex (1)

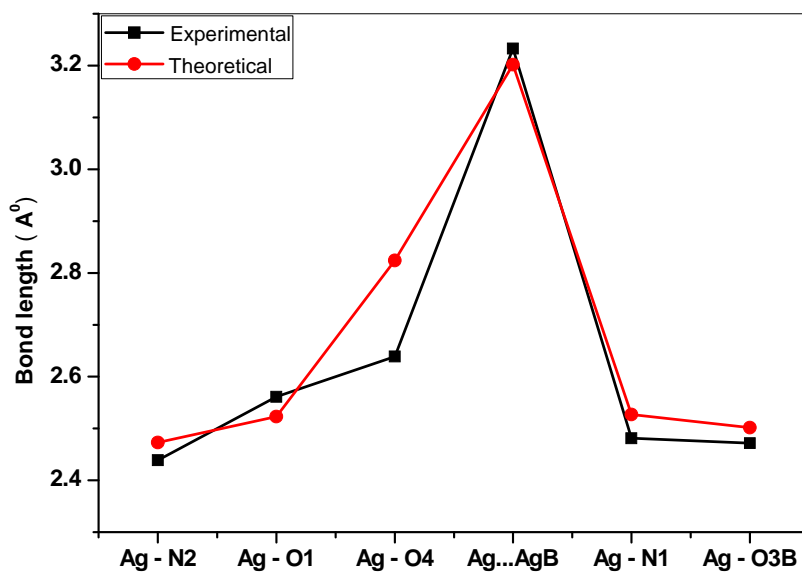

(a)

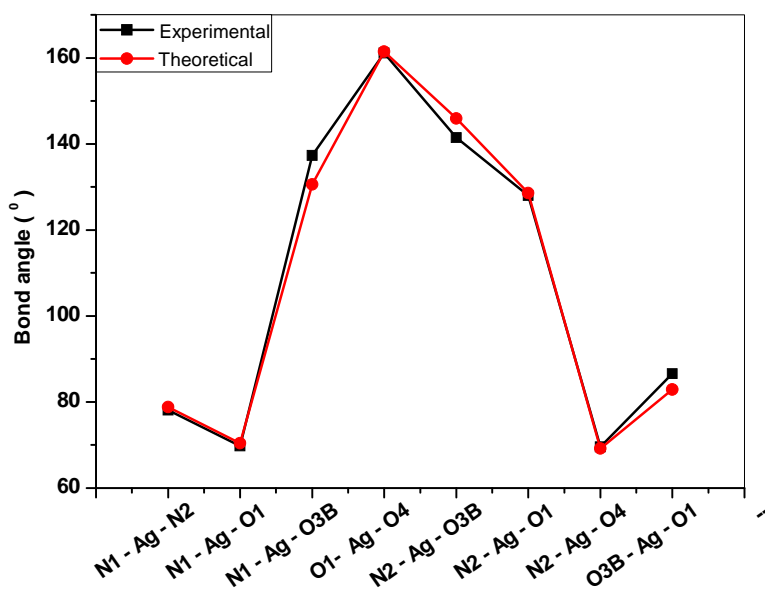

(b)

**Fig. S13** Deviations of theoretical and experimental (a) bond lengths (Å) (b) bond angles (°) for complex (2)

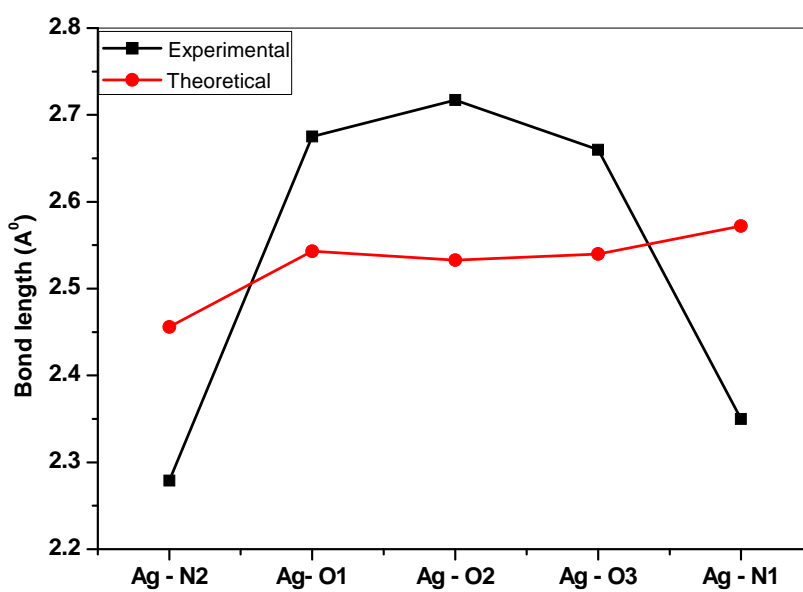

(a)

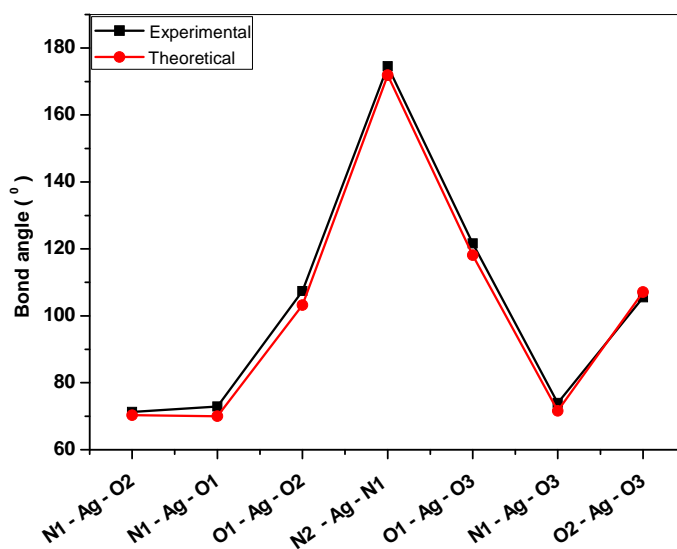

(b)

**Fig. S14** Deviations of theoretical and experimental (a) bond lengths (Å) (b) bond angles (°) for complex (3)
